# Supplementary material
Source: publisher site journal article supplement (https://www.spandidos-publications.com/3165/downloadSupplementary)
Supplement: Supplementary file 1 [file downloadSupplementary]

## Sheet: table SI
Table SI. Blood based gene expression profiles.
Sample ID	Sex	Age, years	Disease status	1405_i_at	200004_at	200008_s_at	200009_at	200017_at	200021_at	200039_s_at	200052_s_at	200059_s_at	200064_at	200068_s_at	200078_s_at	200094_s_at	200096_s_at	200098_s_at	200600_at	200602_at	200612_s_at	200613_at	200614_at	200615_s_at	200625_s_at	200633_at	200638_s_at	200639_s_at	200640_at	200641_s_at	200642_at	200656_s_at	200658_s_at	200660_at	200661_at	200663_at	200667_at	200668_s_at	200669_s_at	200675_at	200676_s_at	200678_x_at	200682_s_at	200683_s_at	200684_s_at	200691_s_at	200692_s_at	200701_at	200703_at
006-ctr016	Male	43	Control	14.5116	13.8965	12.0014	13.2	12.749	14.7149	11.8598	11.0379	15.1259	12.5474	12.3332	13.4498	14.4716	13.5246	11.8827	14.4904	9.77159	9.57983	12.2814	12.8144	10.2374	14.1161	16.0935	14.0816	13.6742	14.3068	13.5213	11.7904	11.4636	8.64632	13.828	12.223	13.0741	12.5881	14.3227	14.1835	12.25	9.59221	12.3116	12.1867	10.71	9.95474	11.3635	10.2174	13.4077	12.5494
006-ctr021	Male	47	Control	14.3324	13.9017	11.9142	13.3429	13.4012	14.8986	11.8648	11.3212	15.0376	12.5284	12.4552	13.3654	14.4	13.7418	11.9247	14.6216	10.0491	9.98886	11.8842	12.8599	9.67757	14.2731	16.176	14.1046	13.8448	14.3324	13.3527	12.0399	11.2969	9.25407	13.577	11.9631	13.2225	12.7084	14.4226	14.2076	11.8732	9.28558	12.079	12.225	10.7953	10.0283	11.3862	10.0107	13.2959	12.6515
006-ctr030	Female	42	Control	14.7465	13.9156	11.9034	13.2664	12.9941	14.8215	11.949	11.1056	14.8079	12.5363	12.153	13.1125	14.4181	13.3213	12.2483	14.5735	9.33647	10.3288	11.4941	12.4302	9.68169	14.0261	15.7945	14.0246	13.7759	13.9579	13.4096	11.7376	11.5736	9.47301	14.2395	11.4427	13.0232	12.5098	14.1957	14.124	12.5112	9.24486	11.9547	12.056	10.7761	10.0712	11.5194	10.7116	13.1752	12.7808
006-ctr057	Female	44	Control	15.2992	13.7814	11.5036	13.0188	13.3275	15.6413	11.8319	11.175	15.3127	12.8125	12.1966	13.5013	15.3343	13.51	12.1477	14.8636	9.91329	10.5378	12.9935	12.4059	10.2772	14.7385	17.1069	14.076	13.9933	14.116	13.1784	12.2323	11.7523	9.70649	14.4668	12.0276	13.3821	12.0786	14.2315	13.9864	12.819	10.0934	12.3324	12.3194	10.627	10.0365	11.0761	10.2349	13.1783	12.6883
006-ctr065	Male	55	Control	13.8057	13.9707	12.4046	13.6934	12.802	14.7272	12.3833	11.4051	15.4212	12.7474	12.6578	13.6662	14.9606	13.9921	12.189	14.4441	10.6644	10.3474	10.9156	13.0032	9.43134	14.4124	16.0102	14.1406	13.4583	14.2527	13.5845	12.1576	11.4995	9.52001	14.4706	12.153	13.3696	12.7406	14.3609	14.0377	11.9485	9.62896	12.7722	12.0739	11.3287	10.6832	11.9037	10.6133	13.9909	12.5627
006-ctr069	Female	49	Control	14.4215	14.1593	12.1281	13.487	13.0542	14.9807	12.2627	11.4292	15.2105	12.3418	12.1009	13.9245	14.4426	13.7744	12.1978	14.3797	9.63178	9.12197	10.6741	12.719	9.81531	14.528	16.4074	14.087	13.5603	14.1306	13.3566	12.2204	11.1006	9.63356	14.4369	11.8561	13.2357	12.8494	14.5833	14.4484	12.1376	9.64681	12.156	11.8685	10.849	10.0863	11.6532	10.7768	14.0013	12.9029
006-ctr070	Female	48	Control	14.0772	14.1301	12.1103	13.5741	12.9963	14.7492	12.0615	11.2535	15.0622	12.3752	12.5155	12.9953	14.1756	13.429	12.1863	14.1983	9.65073	10.1244	10.6737	12.7461	9.30568	14.0564	16.3174	13.9131	13.5875	14.0207	13.1321	11.841	11.006	9.37595	13.8763	11.3656	12.9264	12.6871	14.3526	13.8856	11.8367	8.82352	12.2161	12.0538	10.5008	9.64848	11.6756	10.7508	13.8581	12.5379
HSBJ-002	Male	55	Control	15.0432	13.9041	11.7417	13.3183	14.5503	15.1907	12.055	11.7143	14.774	12.7173	12.7761	13.4756	15.3805	13.8759	12.2793	14.3527	9.38556	10.701	12.2663	12.8042	9.96628	14.1718	16.4169	13.8144	13.5649	14.3431	12.6007	12.6185	11.312	9.79788	13.6496	11.7333	13.4165	12.0238	13.9912	13.2231	12.4793	10.189	11.7781	12.7998	10.9574	10.3501	11.3685	9.84377	12.8907	13.0612
HSBJ-003	Female	76	Control	13.9428	13.9835	12.7455	13.7861	14.0156	14.9301	12.0134	11.4168	15.0067	13.097	12.5455	13.6584	14.2785	13.9019	12.183	14.2894	9.58157	9.51262	12.0828	12.9424	9.29772	14.3092	15.8062	14.242	13.566	14.2791	13.8947	12.4407	11.5301	10.0414	14.4445	11.6505	13.0503	12.8579	14.299	13.8711	12.1514	9.2087	12.5747	12.2583	11.1994	10.3099	11.7104	10.7145	13.345	12.622
HSBJ-004	Male	51	Control	14.6448	13.8268	12.1377	13.4138	14.7212	14.5466	11.6415	11.5317	14.7864	12.065	12.425	13.403	15.1563	13.7995	11.951	13.8368	9.0663	10.7658	11.8288	12.5355	9.96059	14.1289	16.9366	14.0715	13.6068	14.1756	13.284	12.9016	11.0817	9.90933	12.7579	11.056	13.3686	12.47	14.3415	14.007	12.3449	9.09337	11.0097	12.6018	10.4481	9.40105	11.4036	10.2397	13.0969	13.0996
HSBJ-005	Male	55	Control	13.4869	14.1157	12.363	13.5923	14.2449	14.9346	11.7237	11.4762	15.2856	11.6988	12.2881	14.2992	14.6679	14.5212	11.5612	13.8978	8.69801	10.0363	12.0083	12.8479	9.35255	14.6037	16.5999	14.3418	13.6565	14.3868	13.6488	12.6235	10.7876	9.66692	15.1584	11.0652	13.5572	13.258	14.9577	14.4653	11.4578	9.43512	11.8262	12.5296	10.7852	9.52021	10.9902	9.76666	13.513	12.9205
HSBJ-007	Female	55	Control	14.5209	13.9783	12.2368	13.5552	15.2931	14.6409	12.0217	12.0097	14.653	12.4009	12.4575	13.0897	15.2634	13.8684	12.0302	13.8505	8.98324	10.7501	11.9344	12.4507	9.95594	13.811	16.8001	13.9935	13.6305	14.2174	13.0721	13.0748	11.1638	9.8565	12.6782	11.0336	12.9172	12.5538	14.2861	13.9496	12.454	9.01299	10.9963	12.4911	10.5245	9.77777	11.5199	10.3317	13.2329	13.3031
HSBJ-009	Female	55	Control	14.694	13.4713	11.473	12.904	14.2315	14.5253	11.6239	11.0324	15.0688	11.744	12.6327	13.4126	15.5512	13.8672	11.7168	14.237	9.60999	11.7433	13.8109	12.5106	11.7209	14.1607	18.0858	13.4575	13.3708	14.1668	12.2019	12.3556	11.1012	9.35487	13.3434	11.1076	13.4632	12.3915	14.9153	14.5585	11.4971	9.55454	11.7369	12.634	10.2029	10.0933	11.0565	9.15372	13.1865	13.2579
HSBJ-011	Male	53	Control	14.8962	13.9297	12.1261	13.4112	13.6132	15.0991	11.8566	11.4404	15.152	12.4628	12.5171	13.3267	15.1287	13.8302	11.7405	14.6832	10.0503	11.5168	12.815	12.6625	10.4376	14.3498	16.9343	14.1964	13.6681	14.3865	13.3153	12.4059	11.4668	9.28306	13.4264	11.9436	13.1728	12.66	14.5502	14.4297	12.2725	9.37197	11.9514	12.7269	10.5152	9.77413	11.5674	10.3168	13.2857	13.0983
HSBJ-013	Female	54	Control	15.4039	14.0112	11.0705	13.4641	14.5972	15.2604	12.1866	11.8626	14.6323	12.3147	12.9352	13.2648	15.5499	14.1688	12.5785	14.3811	9.72447	11.7554	11.8886	12.8129	9.72043	14.4868	16.3276	13.288	13.9653	14.5057	11.5437	13.1214	11.697	10.1034	14.2071	11.6113	13.1964	11.6865	13.4715	13.1624	12.547	10.7031	11.6057	12.5841	11.1966	10.4378	11.1763	9.37357	13.0609	13.2606
HSBJ-014	Male	53	Control	14.9228	14.0061	11.8559	13.1745	14.522	14.824	12.0356	11.6715	15.0343	12.4115	12.5862	13.0945	15.3051	13.8068	12.0311	14.3228	9.21949	11.1029	12.62	12.6394	10.0225	14.2013	17.2405	14.097	13.4216	14.3546	13.1706	12.781	11.1353	9.70504	13.1145	11.8423	13.124	12.7095	14.7281	14.243	12.4458	9.49994	11.0337	12.451	10.8879	9.61496	11.6367	10.6104	12.9693	13.3108
HSBJ-017	Female	54	Control	13.6929	13.8878	12.5374	13.5331	14.4237	14.3738	11.5224	11.6116	14.6883	12.3705	12.3034	13.464	14.6195	13.7333	12.178	13.5654	8.67161	10.6911	11.3904	12.3212	9.23959	13.9469	15.7487	13.9669	13.4567	13.7294	13.2733	12.7883	11.2285	10.2946	13.6078	10.792	12.7192	12.6292	14.0588	13.6848	12.0914	8.94342	11.2788	12.1387	10.5339	9.66962	11.4124	10.6579	13.0988	12.748
HSBJ-018	Male	55	Control	13.8516	14.0701	12.4626	13.5666	14.4579	14.5927	11.8356	11.5574	14.8307	12.1332	12.5686	13.5879	14.5359	14.0561	12.0841	13.8243	9.15192	10.7529	11.8165	12.8072	9.18276	14.1051	15.9069	13.9697	13.3878	13.8297	13.2358	12.7098	11.2943	9.95694	13.9306	11.1194	12.9107	12.7441	14.2764	14.0197	11.9831	9.33432	12.0189	12.2478	10.8174	10.2689	11.2679	10.3305	13.5496	12.8027
HSBJ-019	Female	47	Control	13.9229	13.9607	12.0703	13.2042	14.6975	14.5933	11.4538	11.5253	14.6028	12.0796	12.3894	13.7202	14.5184	14.0518	12.071	13.7113	8.37232	10.473	11.6319	12.6844	8.9625	14.0349	15.9938	13.922	13.6732	13.9491	12.9984	12.9436	11.3733	9.96343	13.6998	11.0755	12.6676	12.7504	14.2138	13.8301	11.9566	9.09734	11.3333	12.0948	10.5079	10.0127	11.2166	10.3323	13.2062	12.5401
HSBJ-020	Male	55	Control	14.4544	13.8645	12.0186	13.2821	14.0764	14.9529	11.9087	11.1883	15.0429	12.1555	12.2859	13.5971	14.8372	13.7063	11.9315	14.5382	10.0298	10.9152	12.3493	12.6258	10.0285	14.057	16.6661	14.1111	13.5811	14.353	13.4547	12.3888	11.0828	9.52318	13.3269	11.6569	13.2645	12.464	14.4659	14.128	12.2148	9.46362	11.843	12.5624	10.7933	10.0868	11.3667	10.4821	13.0041	13.0161
HSBJ-021	Male	61	Control	14.1067	13.9547	12.0967	13.3942	14.9771	14.4771	11.2126	11.6707	14.8171	11.8101	12.2973	13.5159	15.3472	13.8725	11.8348	13.6894	9.22229	10.992	11.8913	12.4791	9.81253	14.2093	17.2161	13.9261	13.3309	13.8864	13.083	12.688	10.9609	9.50234	12.7355	11.0245	13.2704	12.8248	14.6489	14.4635	11.8528	9.07743	11.0206	12.5614	9.8034	9.55835	11.2325	10.1413	12.8177	13.1416
HSBJ-023	Female	53	Control	14.633	13.942	11.8351	13.3336	14.3027	14.7833	12.022	11.5931	14.8639	12.1455	12.2663	13.429	15.0304	13.8434	12.2545	14.0575	9.12842	10.7367	11.0416	12.4267	9.05144	13.8054	16.4275	13.9637	13.7063	14.1606	13.0493	12.7566	10.9054	9.95636	13.8755	11.257	13.034	12.5079	14.2502	13.7542	12.138	9.53534	11.1835	12.3565	10.729	9.91844	11.4273	10.3278	13.1444	13.077
HSBJ-024	Female	58	Control	14.1018	13.9333	12.2659	13.4839	14.6845	14.436	11.7411	11.6008	14.538	11.9752	12.4046	13.5047	14.4207	13.8219	12.0475	13.7582	8.46911	10.5784	11.2938	12.6065	9.10458	13.8899	15.8796	13.8435	13.5034	14.1721	13.0541	12.8182	11.3686	10.0969	13.9236	11.0855	12.8199	12.6768	14.1548	13.7803	12.2341	8.92996	11.31	12.1339	10.6733	9.6725	11.3103	10.4008	13.0017	12.708
HSBJ-025	Female	44	Control	14.8165	13.8552	12.3244	13.4603	13.8755	14.8789	11.9498	11.5892	14.4992	12.1376	12.6106	13.0418	14.9334	13.7044	12.0629	13.9108	9.44868	10.9663	11.9206	12.6428	9.65219	13.9326	16.3373	13.8523	13.505	13.9336	13.0747	12.3085	11.2439	9.80406	13.1656	11.5879	13.0504	12.5399	14.0275	13.5834	12.1001	9.12058	11.9337	12.4237	10.6664	10.1846	11.3931	10.3707	13.1738	12.4631
HSBJ-026	Female	52	Control	14.1235	13.97	12.2052	13.5067	14.5214	14.5863	11.6375	11.5966	14.6286	12.3211	12.3219	13.2988	14.5127	13.8622	12.0798	13.8754	9.51807	11.0254	11.8943	12.653	10.486	13.8761	16.4993	13.8922	13.5364	13.9319	13.0049	13.1308	11.0664	9.91793	13.0408	11.0234	12.8061	12.8164	14.5054	14.0096	12.1464	9.245	11.6727	12.1558	10.2349	9.90277	11.5164	10.4444	13.3023	13.401
HSBJ-027	Male	50	Control	14.2781	14.0076	12.2141	13.4581	14.008	14.9639	11.6016	11.4658	14.959	12.167	12.5284	13.3916	15.3077	13.6187	12.0166	14.26	8.93418	10.7636	12.4139	12.7887	10.4403	14.1969	16.665	14.1174	13.6849	14.2218	13.3249	12.3461	10.994	9.35958	13.5258	11.1746	13.1675	12.674	14.5262	14.1634	11.9298	9.32095	11.7432	12.326	10.6641	9.93459	11.371	10.4317	12.8679	12.6274
HSBJ-028	Male	65	Control	14.7317	13.8306	11.7492	13.1087	13.5605	14.7353	12.3566	11.5468	14.7379	12.6389	12.6831	13.0949	15.1595	13.6821	12.451	14.5082	9.77221	11.2251	12.4428	12.5901	10.2025	14.1165	16.2405	13.6854	13.6542	14.3996	12.8067	12.3632	11.5027	9.46158	13.4502	12.2077	13.0008	11.7395	13.7146	13.5045	12.6693	10.3134	12.3699	12.5481	11.2644	10.9585	11.4012	10.2961	13.1458	13.2282
HSBJ-030	Male	56	Control	14.0019	13.8409	12.355	13.6136	15.0059	14.4426	11.4702	11.6258	14.8433	12.1386	12.5849	13.556	15.3228	13.9545	11.7086	13.8092	8.58765	10.3383	12.7882	12.6255	10.0702	14.2296	16.9053	14.0948	13.3235	14.1229	13.2604	12.8495	10.899	9.6773	12.78	11.1325	13.3337	13.1161	14.6386	14.3099	11.7074	9.04408	11.4805	12.3095	10.0401	9.57005	11.4247	10.1288	13.1116	13.2402
HSBJ-031	Female	47	Control	14.1789	13.8626	12.0388	13.4434	14.677	14.0382	11.1963	11.3131	14.7925	12.2795	12.2434	13.5191	14.9955	13.6855	11.9307	13.7959	9.10587	11.4679	12.443	12.4832	10.6072	13.9827	16.9845	14.0609	13.3844	14.0882	13.2637	12.7981	11.0068	9.70315	13.0216	11.5903	12.6919	12.9216	14.7418	14.3966	12.1616	8.8127	11.0693	12.2326	10.2727	9.35377	11.2207	10.2591	12.775	13.1023
HSBJ-032	Female	49	Control	13.8599	13.8603	12.221	13.4351	14.431	14.2103	11.4197	11.429	14.653	12.2306	12.2921	13.1642	15.1337	13.643	11.8447	13.7861	9.40203	11.1668	11.8839	12.4922	9.87095	13.7614	16.6332	14.0117	13.4005	13.9965	13.1783	12.6296	11.0266	9.6548	13.2584	11.1928	12.6277	12.7189	14.3229	13.9251	12.0838	8.80271	11.4964	12.2216	10.3719	9.54768	11.416	10.2193	13.1614	12.3819
HSBJ-033	Female	53	Control	14.6181	13.8068	11.9924	13.4009	14.21	14.605	11.6904	11.7602	14.9479	12.2421	12.6315	13.414	15.0662	13.7752	11.7725	14.1898	9.95686	10.8296	12.531	12.5987	10.3211	13.9708	16.9032	14.0782	13.424	14.2848	13.3624	12.5332	11.1885	9.61161	13.1702	11.2586	13.2953	12.5603	14.4832	14.1306	12.3843	9.56141	11.4401	12.4525	10.6071	10.0312	11.4494	10.1704	13.0562	13.0199
HSBJ-034	Female	55	Control	13.6997	13.8216	11.8061	13.337	14.9693	14.3701	11.7056	11.6363	14.7684	12.0805	12.5402	13.6784	15.1157	14.2366	11.7833	13.446	8.52493	10.5249	12.0064	12.4891	9.8801	14.2308	17.2641	14.1425	13.3145	14.1661	13.2509	12.9789	10.9933	9.79043	13.144	11.1583	13.0458	12.8497	14.5974	14.3797	11.8468	9.20335	11.2479	12.4725	10.2561	9.60376	11.2226	9.86925	13.3191	12.9571
HSBJ-035	Male	55	Control	13.6908	14.0084	12.4929	13.6309	13.3551	14.7322	11.3457	11.3698	15.0381	12.5412	12.5854	13.581	15.3043	13.469	12.0128	14.3707	9.91188	11.1374	11.8213	12.9481	9.80682	14.2554	16.1242	14.05	13.5403	13.9186	13.458	12.142	11.581	9.67093	13.9808	11.7557	12.9138	12.6135	14.1779	14.0254	12.3233	9.60804	12.1708	12.2882	10.9279	10.2145	11.4649	10.2699	13.3379	12.757
QDCS-001	Male	79	Colorectal Cancer	14.8934	13.715	12.2358	13.4728	13.9297	15.5191	12.1857	11.5983	15.4787	12.0573	12.1989	13.9894	15.6061	13.9396	11.9184	14.5967	10.1054	11.3183	12.5325	12.8339	10.5315	14.3181	16.7784	14.3088	13.8589	14.5486	13.6924	12.3558	11.2743	9.93907	14.4567	12.0726	13.8502	12.4505	14.6824	14.1841	12.3165	9.89882	12.4848	12.8126	10.9699	10.3454	11.3667	9.96126	13.8361	13.1496
QDCS-003	Male	80	Colorectal Cancer	14.53	13.648	12.3237	13.6043	13.4811	15.3989	12.1594	11.2471	15.2115	12.3088	11.9743	13.8448	14.9631	13.8613	11.9116	14.4491	9.66008	11.4393	12.0572	12.7058	10.6917	14.3524	16.5912	14.1601	13.6744	14.0313	13.7017	12.6835	11.5581	9.74228	14.6344	12.0016	13.4227	12.6596	14.5381	14.2787	12.4245	9.68598	12.5842	12.4182	10.9653	10.3728	11.1525	10.3537	13.821	13.3035
QDCS-004	Male	55	Colorectal Cancer	15.1027	13.4404	11.4719	13.0855	14.3834	15.5325	12.2594	11.6209	15.0135	12.8628	12.1386	13.7623	15.541	13.9339	12.4368	14.8054	9.84948	11.91	12.3473	12.3997	9.94377	14.4572	16.6012	13.5993	13.5437	14.1904	12.7443	12.6191	11.9461	9.86049	14.4576	11.9932	13.3984	11.5538	13.7102	13.3266	13.1896	10.5191	12.0361	12.8076	11.5343	11.2069	11.4219	10.0066	13.3346	12.6552
HSBJ-038	Male	42	Control	14.809	13.6523	11.819	13.106	13.444	15.1518	12.0423	11.5155	15.2057	12.5204	12.1366	13.6783	15.4518	13.3102	12.259	14.3808	9.03389	10.9899	12.6245	12.2782	10.3362	14.1061	17.1619	14.3221	13.4642	14.3672	13.5651	12.2744	11.1496	9.51805	13.4998	12.0028	13.2066	12.4276	14.328	13.9996	12.5085	9.67568	11.8148	12.8582	10.668	9.7696	11.3443	10.426	13.256	12.9465
HSBJ-039	Male	46	Control	14.7404	13.8173	12.2298	13.3981	14.1631	15.0231	11.9808	11.6981	14.9947	12.3081	12.5689	13.5114	15.0178	13.7693	12.0165	14.4362	9.18962	10.9937	12.1281	12.7354	9.76926	14.3591	16.5091	14.1395	13.6251	14.3272	13.657	12.5366	11.4786	9.85495	13.6984	11.7813	13.1862	12.5816	14.3451	13.8407	12.3321	9.38368	12.0857	12.5548	10.9565	9.91513	11.734	10.6735	13.2849	13.0209
HSBJ-040	Male	48	Control	14.4652	13.8347	11.6952	12.9451	14.024	15.1701	12.0567	11.144	15.0709	12.4066	12.2586	14.029	15.1893	13.9191	12.1687	14.7688	9.6942	10.6544	12.3656	12.5753	9.77164	14.3699	16.2279	13.8408	13.831	14.2384	12.9126	12.3346	12.0176	9.68949	15.0486	12.4291	13.3086	11.8008	13.832	13.5435	12.2795	10.2863	12.7801	12.6462	11.1386	10.7615	11.2846	10.1499	13.3742	12.329
QDCS-005	Female	51	Colorectal Cancer	14.0139	13.8353	12.6963	13.6214	14.6797	14.7294	11.8211	11.6381	14.6809	12.4357	12.4492	12.7888	14.9149	13.3913	12.2688	13.8598	9.04823	10.7078	10.952	12.4147	9.40376	14.0118	15.7179	13.886	13.6378	13.6186	13.4513	12.5699	11.5241	10.2884	13.9052	11.3702	12.8172	12.4607	14.0378	13.8655	12.6008	9.42513	11.3416	12.2568	11.0466	10.6669	11.6453	10.6807	13.0623	12.5286
QDCS-006	Female	73	Colorectal Cancer	14.6662	13.8537	12.5967	13.7371	14.3998	14.9561	11.8231	11.6642	14.6736	12.1454	12.4247	13.1025	14.9999	13.8479	12.0084	14.045	9.08467	11.1879	11.552	12.666	9.67281	13.9624	15.94	13.9039	13.5664	14.0826	13.1672	12.727	11.7738	10.1378	13.4934	11.1355	12.9478	12.5908	14.0217	13.8995	12.5007	9.91616	11.7132	12.5299	10.8822	10.711	11.3788	10.2198	13.1719	12.6733
QDCS-007	Male	65	Colorectal Cancer	14.4096	13.5706	12.0887	13.2176	14.1371	15.4484	12.2106	11.5047	15.0277	12.5537	12.6164	13.3706	15.4589	13.4729	12.1013	14.5754	10.0529	11.4357	11.9792	12.5802	10.1611	14.2444	16.8203	14.0894	13.7005	14.4095	13.4218	12.3916	11.4904	9.78177	13.4816	11.6048	13.1317	12.119	14.1105	13.6348	12.3441	9.9017	12.222	12.8441	10.9635	10.282	11.5667	10.3916	13.2209	12.2879
QDCS-008	Male	54	Colorectal Cancer	14.9654	13.7031	11.945	13.3651	14.4343	15.6887	12.0005	11.4338	15.1644	12.6828	12.7293	13.1603	15.4918	13.63	11.7646	14.689	9.94158	11.5775	12.5969	12.774	10.6407	14.1908	17.0752	14.0746	13.522	14.4077	13.1759	12.4638	11.5967	9.44249	13.6552	11.9705	13.6737	12.6379	14.5538	14.0476	12.9514	9.99052	12.3825	12.7465	10.8806	9.82688	11.3752	10.0555	13.5767	12.7882
QDCS-009	Male	78	Colorectal Cancer	14.2791	13.8578	12.1795	13.7268	13.9745	15.6668	11.9227	11.5193	15.2422	12.1837	12.5476	13.6665	15.4698	14.0085	11.7354	14.5583	10.0633	11.2385	12.8569	13.1721	10.2718	14.5297	16.6539	14.0326	13.5435	14.3009	13.3117	12.3798	11.6645	9.35469	15.183	12.6764	13.8915	12.664	14.4828	14.0029	11.5906	9.97969	13.0163	12.8153	10.9431	10.3305	11.1987	9.86083	13.7973	12.7317
QDCS-010	Female	72	Colorectal Cancer	13.9416	13.9095	12.4973	13.8957	15.2003	15.5819	12.2099	12.0439	14.9113	12.1803	12.2385	13.3598	15.6591	14.0556	12.1393	13.5996	8.8195	10.7431	12.6676	12.5325	10.5318	14.061	16.7332	13.9637	13.3077	14.0422	13.3548	13.0961	11.402	9.70993	13.9435	11.6593	13.1537	12.7756	14.7063	14.1375	12.462	9.54308	12.0605	12.8481	10.8312	9.92485	11.4665	10.3559	13.8469	13.3361
QDCS-011	Female	47	Colorectal Cancer	13.4989	13.8135	12.2726	13.5458	14.7355	15.3872	11.943	11.4229	15.0308	12.248	11.9956	13.4547	15.166	13.9934	11.5282	13.9616	8.8343	10.8004	12.9634	12.7427	11.1657	14.6465	17.1377	14.0417	13.5357	14.1443	13.2452	13.6981	11.3617	9.40294	15.3062	12.3853	13.726	13.2482	15.0503	14.7201	11.5305	9.47691	12.3418	12.4715	10.7021	9.82566	11.1237	10.0714	13.0972	13.8796
QDCS-012	Female	79	Colorectal Cancer	13.3321	13.9112	12.1939	13.6787	14.5615	15.2822	12.7132	11.9818	14.8878	12.4697	12.3432	13.2932	15.3502	13.7544	12.1986	13.5463	8.99871	11.0328	12.6166	12.6812	10.9164	13.7898	16.9203	13.9218	13.5068	14.0497	13.1427	13.3057	11.7578	10.1108	13.5118	12.0304	13.3035	12.5633	14.4302	13.9466	12.6785	9.02761	12.4468	12.5254	10.6767	9.77548	11.4733	10.4729	13.528	13.9499
QDCS-013	Male	64	Colorectal Cancer	14.0882	13.8519	11.8386	13.1992	13.1193	15.9192	12.127	11.1919	15.3566	12.0283	12.5112	13.6341	15.2955	13.8109	11.7358	14.59	10.4069	11.5633	13.0785	13.0384	10.7216	14.4779	17.1392	13.8316	13.3364	14.3345	13.019	11.9293	11.5504	9.2336	15.1689	12.8462	13.6224	12.3727	14.4117	13.9136	11.9171	9.57802	12.9573	12.7896	10.7339	10.352	11.032	9.36813	13.6856	13.215
QDCS-014	Male	64	Colorectal Cancer	13.4813	13.8432	12.167	13.4519	13.5168	14.9762	11.647	10.8845	15.1649	12.1953	12.2942	13.5241	15.0058	13.7528	11.6754	14.4724	10.6621	11.2694	12.772	12.8568	10.6651	14.3428	16.906	14.0264	13.3659	14.167	13.6941	12.4417	11.1627	9.31159	14.0024	12.6749	13.1992	12.9398	14.599	14.2577	11.5395	9.83876	12.5144	12.875	10.9904	10.4799	11.2024	9.85544	13.2476	13.0861
HSBJ-043	Female	48	Control	13.8334	13.9408	12.173	13.3997	13.8887	15.1449	11.7977	11.3898	15.0805	12.3648	12.569	13.4738	15.1628	13.4833	11.7854	14.3177	9.25875	10.5156	12.3045	13.0833	9.85836	14.0491	16.5364	14.1566	13.743	14.2706	13.692	12.4237	11.3921	9.37624	14.2136	11.629	13.1818	12.6225	14.5049	14.0668	12.3181	8.92055	11.9471	12.4666	10.5121	9.78617	11.5588	10.5421	13.1498	12.3741
HSNJ-001	Female	49	Control	14.9612	13.5263	11.4593	12.873	13.0207	15.3116	12.3073	11.1856	15.0837	12.5824	12.4601	13.4388	15.2858	13.2667	11.8481	14.696	9.9498	10.6996	12.4596	12.6374	10.2982	13.9987	16.6614	13.6323	13.4629	14.2983	12.7318	12.001	11.7222	9.03258	13.9935	12.5035	13.3577	11.9285	14.0128	13.8896	12.9242	9.94879	12.2396	12.4085	10.935	10.4772	11.5089	10.4899	13.3823	12.6246
HSNJ-002	Male	50	Control	14.683	13.7873	11.7901	13.1838	13.6211	15.1223	11.9626	11.4025	15.0046	12.5167	12.5076	13.3117	15.3082	13.4184	12.1826	14.5574	9.70692	11.3804	12.6944	12.5573	10.205	14.1273	16.3554	13.8151	13.711	14.2409	12.7792	12.2377	11.7165	9.19643	13.7668	12.0323	13.11	12.0595	14.0711	13.9329	12.9591	9.92481	12.3271	12.3195	10.7618	10.107	11.5882	10.4644	13.2784	12.6764
HSNJ-003	Female	49	Control	14.554	13.8837	11.6899	13.1137	12.9808	15.369	12.1895	11.2319	15.1345	12.5937	12.4361	13.7162	14.8208	13.7082	12.3272	14.5973	9.54777	10.4297	12.5165	12.7945	10.1651	14.3864	16.3062	13.7568	13.7301	14.2858	12.8505	11.9188	11.7659	9.30534	14.8851	12.6381	13.42	12.1768	14.0072	13.6939	12.7328	10.0793	12.8049	12.3882	11.2871	10.8637	11.4034	10.1476	13.6632	12.4625
HSNJ-004	Male	52	Control	14.7643	13.772	11.7719	13.1702	13.8265	15.3226	11.6825	11.2123	15.1463	12.35	12.7406	13.5634	15.132	13.7558	12.2314	14.6925	9.8208	10.7909	12.457	12.8374	10.4641	14.4022	16.6645	13.7866	13.8623	14.3504	12.6935	12.1738	11.5369	9.07587	13.7173	12.0659	13.4551	12.4337	14.3201	14.1498	12.4295	9.60983	12.3062	12.5128	10.7121	9.74895	11.3621	10.1818	13.4161	12.8415
HSNJ-005	Male	50	Control	14.6383	13.7073	11.5332	13.0002	13.441	15.2302	11.9239	11.2924	15.0084	12.4268	12.4432	13.4143	14.7955	13.5569	12.1056	14.6325	9.55361	10.7292	12.7359	12.6235	9.76921	14.4343	16.2013	13.7679	13.6247	14.2109	12.8685	12.0971	11.8816	9.51041	14.5355	12.1468	13.3165	12.3016	13.8895	13.7036	12.9845	9.49787	12.3659	12.2039	10.7042	9.99915	11.2254	10.2049	13.3927	12.6897
HSNJ-006	Male	49	Control	14.7664	13.8337	11.943	13.3153	15.019	15.2124	11.979	11.8309	14.7481	12.7479	12.4013	12.7211	15.2438	13.34	12.6255	14.1532	9.37841	11.072	12.099	12.4821	9.69299	14.027	16.0215	13.7739	13.7104	14.058	12.8275	12.7656	12.234	10.0662	13.5947	11.5268	12.78	11.8612	13.6369	13.5335	13.301	9.52259	11.5973	12.287	11.1089	10.051	11.8761	10.9957	13.2216	12.704
HSNJ-007	Male	56	Control	15.1154	13.6783	11.56	12.953	13.732	15.7052	11.9837	11.2883	15.1497	12.5355	12.6354	13.2402	15.0955	13.4869	12.0525	14.6668	9.36316	10.9842	12.5383	12.5955	9.96678	14.2704	16.7908	13.7671	13.4952	14.3499	12.8122	12.03	11.7365	9.38219	14.0648	12.3548	13.4034	11.8399	13.8994	13.511	13.3413	9.93087	12.5122	12.4304	10.9309	10.0613	11.3931	10.0723	13.2644	12.7793
HSNJ-008	Male	55	Control	15.076	13.7135	11.5392	12.9883	13.7417	15.6004	12.0974	11.1261	15.1379	12.3265	12.2678	13.2638	15.1938	13.3515	12.1973	14.6189	9.71949	11.0038	12.5498	12.6529	10.1223	14.3741	16.5612	13.8378	13.7947	14.4439	12.8804	12.0102	11.263	9.51328	13.8171	11.9192	13.3914	12.0271	14.1733	13.8424	12.9736	9.76743	12.2016	12.3147	10.8902	10.1856	11.4116	10.254	13.3414	12.7639
HSNJ-009	Female	46	Control	14.5231	13.5513	11.3526	12.9462	14.4354	15.4193	11.9012	11.1847	14.927	12.7058	12.3167	13.0917	15.5602	13.1916	12.3741	14.4698	9.68149	10.8756	12.2112	12.3504	9.84655	13.9837	16.4725	13.6613	13.4523	13.9075	12.8924	12.2238	11.4417	9.18386	14.3207	12.2292	12.9156	11.9435	13.7052	13.6191	13.1999	9.62941	11.9832	12.2425	10.5971	10.1304	11.3393	10.3742	13.2044	12.5656
HSNJ-010	Male	56	Control	14.5441	13.7079	11.6678	13.0289	14.2743	15.6819	11.9559	11.4267	15.0463	12.5743	12.3029	13.3384	15.3388	13.5586	12.1912	14.4506	9.26511	10.7407	12.6783	12.3266	9.71762	14.3872	16.6432	13.8438	13.5016	13.9518	13.1045	12.5005	11.834	9.67688	14.5509	12.1027	13.3808	12.022	14.0368	13.6202	12.9918	9.38376	11.9599	12.3371	10.9781	10.1812	11.2554	10.3253	13.2764	12.6306
HSNJ-011	Male	45	Control	15.0237	13.6249	11.7604	13.0933	13.7003	15.4762	12.1504	11.4543	15.184	12.482	12.506	13.2759	15.5918	13.5018	12.1689	14.642	9.7184	10.8047	12.6655	12.5824	10.0282	14.253	16.8608	13.898	13.435	14.3229	12.9356	12.1585	11.6636	9.43825	13.3587	12.218	13.2799	12.1979	14.3304	13.919	12.6037	9.99847	12.5071	12.4996	11.0542	10.5233	11.5018	10.2149	13.3615	12.9642
HSNJ-012	Male	49	Control	14.9043	13.6744	11.7469	13.2917	14.209	15.565	12.4636	11.5691	14.9623	12.8379	12.6458	12.7777	15.6454	13.2313	12.4071	14.4785	9.54564	11.1635	12.7852	12.6397	10.3895	13.996	16.7033	13.8518	13.5676	14.3865	12.8791	12.5583	12.0459	9.65799	13.0858	12.3339	13.3105	11.7782	13.9485	13.5125	12.6914	10.2364	12.3418	12.5221	11.2649	10.5052	11.5851	10.4411	13.3546	12.8892
HSNJ-013	Male	50	Control	14.7348	13.6845	11.621	13.1111	14.3321	15.3771	11.9319	11.4813	14.8942	12.5243	12.6149	12.9054	15.4792	13.1559	12.113	14.4113	9.64573	10.9955	12.6773	12.5522	10.0866	13.9635	16.5144	13.765	13.7223	14.2243	12.8632	12.2176	11.6468	9.61074	13.0973	12.1446	13.3057	12.0305	13.9368	13.613	12.9478	9.88343	12.2444	12.3755	10.9064	10.5312	11.6509	10.759	13.1188	12.9878
HSNJ-014	Male	47	Control	14.6522	13.7276	11.6929	13.1624	13.9575	15.5953	11.8275	11.1068	15.2002	12.2138	12.4455	13.6142	15.1855	13.6389	11.8334	14.5992	9.15341	10.6114	12.5478	12.802	9.72834	14.4249	16.3192	13.9556	13.774	14.2658	13.1669	12.0712	11.5995	9.52347	15.0125	12.1264	13.5231	12.4138	14.304	13.7895	12.608	9.73706	12.5984	12.2706	11.2346	10.2454	11.2437	10.2354	13.3471	12.5789
HSNJ-015	Male	54	Control	15.3365	13.7267	11.4744	13.0529	14.0748	15.5472	12.0767	11.3604	15.1583	12.3116	12.4919	13.2576	15.2639	13.4977	12.0387	14.6674	9.43682	10.7857	12.7754	12.6513	10.0701	14.459	16.4861	13.8802	13.7389	14.3748	13.1349	12.2438	11.7842	9.59003	14.4155	12.099	13.2509	12.1999	14.1575	13.8896	13.1415	9.94321	12.2455	12.31	11.1408	10.3857	11.6433	10.5502	13.1591	12.7362
HSNJ-016	Male	45	Control	14.5336	13.7154	11.8354	13.208	13.9618	15.3078	12.1805	11.582	14.9507	12.8475	12.5561	13.344	15.4254	13.2685	12.4653	14.6396	9.24955	9.52904	12.6868	12.5696	9.57998	14.124	16.3388	13.8968	13.5893	14.2549	12.9841	12.1202	12.1656	9.63311	13.899	12.3773	13.183	11.9358	13.7762	13.5782	13.3084	9.87282	12.3891	12.1719	11.0285	10.249	11.6518	10.6548	13.3726	12.6278
HSNJ-017	Male	48	Control	14.472	13.8239	11.9224	13.4497	15.4527	15.3396	12.0617	12.0096	14.7918	12.6241	12.6332	12.6654	15.5155	13.3825	12.3078	14.2391	9.20712	11.094	12.7763	12.6973	10.12	13.771	16.6544	14.0343	13.579	14.3594	13.2512	12.9576	11.598	9.84099	12.5998	11.7	13.0911	12.4416	14.1341	13.7116	13.0875	9.46026	11.8422	12.3269	11.0454	9.89957	11.864	10.414	13.1035	13.0969
HSNJ-018	Male	46	Control	15.0119	13.6766	11.8138	13.2393	14.5496	15.6288	12.1868	11.5029	15.0824	12.4784	12.8517	13.2077	15.4935	13.4962	12.14	14.6109	9.4816	11.0151	12.8692	12.6356	10.5038	14.3044	16.9668	13.8902	13.5342	14.3755	12.9681	12.2633	11.6273	9.71371	13.0393	12.0334	13.4692	12.3646	14.1515	13.8287	13.1138	9.91796	12.2269	12.5152	10.7763	10.3189	11.6087	10.0091	13.1271	13.0838
HSNJ-019	Male	54	Control	14.5595	13.7002	11.8179	13.2026	13.8325	15.3696	12.2894	11.5482	15.0784	12.457	12.3621	13.7336	15.1712	13.6079	12.2715	14.4858	9.63556	10.7046	12.6667	12.696	9.80142	14.3984	15.9964	13.9419	13.6377	14.0912	13.1392	12.1417	11.9889	9.73966	14.7984	12.0643	13.2074	12.3483	14.0177	13.6427	13.0739	9.71636	12.7777	12.097	11.3143	10.81	11.6214	10.4637	13.7433	12.6613
HSNJ-020	Female	55	Control	14.4488	13.5915	11.7762	13.1731	14.492	15.5433	11.9844	11.5317	15.0823	12.4292	12.4426	13.331	15.5383	13.4397	12.0355	14.3788	9.43625	10.7499	12.8099	12.6186	10.4904	14.1979	16.7746	13.9301	13.5411	14.3085	13.2333	12.5075	11.5494	9.27236	14.4111	12.2037	13.1183	12.2171	14.225	13.7964	12.4055	10.0891	12.3582	12.3003	10.7665	10.0977	11.348	10.2641	13.2269	12.8173
HSNJ-021	Female	52	Control	14.8011	13.778	11.5051	13.1181	13.0817	15.7882	12.2488	10.7662	15.5393	12.1256	12.1075	14.2604	14.9332	13.8603	11.7337	14.8163	9.31388	10.3006	13.0078	12.7168	10.1914	14.7231	16.7148	14.0866	13.6805	14.281	13.3558	11.7995	11.8836	8.9419	15.8129	13.3301	13.7104	12.4961	14.4892	14.116	12.8292	9.86928	12.9731	12.3132	11.428	10.7223	10.7558	9.44122	13.667	12.7544
QDCS-015	Male	56	Colorectal Cancer	15.6417	12.5941	10.647	11.9713	14.1609	16.5845	12.1404	11.2475	14.7681	12.6802	12.3678	13.8895	15.7381	13.4981	12.2601	14.8425	8.76342	11.9781	13.5882	11.9836	9.89932	14.5375	17.5877	12.0444	13.1528	14.2137	11.0569	12.209	11.7894	9.71563	15.1301	12.6004	14.0212	10.3091	13.1933	12.917	13.3454	10.7766	13.1612	12.6372	11.0444	10.6816	10.6734	9.02158	13.6575	12.9916
QDCS-017	Female	71	Colorectal Cancer	13.2324	13.8743	10.743	13.3027	13.2859	15.9025	12.1845	10.6043	15.0768	11.2132	12.3835	14.3435	13.8966	14.9858	11.7459	15.0247	9.80211	11.7425	12.4351	13.8341	10.9991	15.5683	16.6717	13.0138	14.6696	14.8438	11.4461	12.6072	11.9755	9.07701	16.132	13.2311	14.8796	11.7395	13.6357	13.4681	11.0165	10.5243	13.1094	13.1315	11.1358	10.8345	9.53099	7.66283	12.7686	13.6191
QDCS-018	Male	72	Colorectal Cancer	13.9192	13.8314	12.2193	13.4488	14.2956	14.6752	11.9637	11.6253	15.0089	12.133	12.5605	13.2516	14.9814	14.0299	11.8359	14.1939	8.91876	10.1738	12.6533	12.3353	9.44244	13.9035	16.2896	14.0985	13.5888	14.3452	13.3288	12.5944	11.3199	9.7246	13.2798	11.1463	13.1974	12.6469	14.2465	14.3269	12.2048	8.92496	11.6396	12.3485	10.5027	9.86711	11.6133	10.4779	13.3598	12.74
QDCS-019	Female	67	Colorectal Cancer	14.0297	13.7743	12.1475	13.2693	13.6312	14.7038	11.8177	11.1487	14.9968	12.2773	12.3357	13.6315	14.4625	13.5369	12.0284	14.6425	9.92996	10.3907	11.9357	12.9269	9.43744	14.2808	15.6865	13.952	13.7554	13.8342	13.2417	11.904	11.6369	9.57399	14.5877	11.9104	13.2161	12.6347	14.1462	14.0932	12.2354	9.12142	12.4927	12.1664	10.791	10.3888	11.4784	10.4617	13.3692	11.8639
QDCS-020	Male	68	Colorectal Cancer	14.7117	13.8079	11.7383	12.9422	14.0657	14.9091	11.6282	11.5684	15.0046	12.4507	12.4933	13.0241	15.149	13.5942	12.0266	14.4382	9.78587	10.9922	12.5304	12.7553	10.0197	13.9892	16.6166	14.0558	13.5219	14.3052	13.2087	12.4209	11.2944	9.50993	13.5013	11.9479	13.1408	12.309	14.1859	13.9444	12.3448	9.75005	11.6356	12.469	10.7394	9.98836	11.8664	10.8001	12.8772	12.8069
QDCS-021	Male	63	Colorectal Cancer	14.2877	13.2982	10.7406	12.4908	13.4735	15.6688	12.2804	11.1312	15.2485	11.8461	12.1753	14.5217	14.8086	14.682	11.8371	15.0404	9.63794	11.8316	12.5896	12.5432	10.4275	14.9674	16.9076	12.9459	13.7317	14.5399	11.4244	12.1182	11.9387	9.5275	16.0383	12.7487	14.3976	11.0425	13.7022	13.7221	12.196	10.8054	13.1515	12.8843	11.0062	10.8098	9.89927	8.67831	13.8751	13.3229
QDCS-022	Male	68	Colorectal Cancer	15.3599	13.0772	10.748	12.3687	14.838	15.4459	12.1265	11.3435	14.8263	12.212	12.0936	13.7278	15.6371	14.2545	12.122	14.4456	10.1596	12.3039	13.4134	12.1202	11.4903	14.0702	17.4638	12.8635	13.5323	14.2919	11.5026	12.8635	11.3042	9.68988	13.9654	12.5906	13.3646	11.2286	14.046	14.0865	12.3584	10.1971	12.0515	12.8679	10.7809	10.0931	10.4969	9.21693	13.9786	14.1306
QDCS-023	Female	61	Colorectal Cancer	14.6153	13.8159	12.1256	13.5643	13.9152	14.7769	12.2973	11.7295	14.8789	12.3427	12.4301	13.255	14.7632	13.9964	12.2332	14.3728	8.93535	10.6916	12.0546	12.681	9.84254	14.2172	16.2597	14.0998	13.8958	14.4418	13.4071	12.3371	11.6962	9.91719	14.0532	11.9669	13.0569	12.4857	14.1271	13.7957	12.4402	9.9825	12.0475	12.3919	11.1029	10.5297	11.7572	10.521	13.5492	12.6346
QDCS-024	Male	58	Colorectal Cancer	14.7517	13.4938	11.5096	13.0303	13.4068	15.2787	12.2412	11.3724	15.1673	12.4105	12.3479	13.8268	15.2934	13.9567	12.194	14.7269	9.89673	11.6849	12.7397	12.7208	10.4181	14.0582	16.9268	13.7522	13.639	14.3656	12.6975	12.4117	11.4898	9.32023	14.2377	12.2201	13.4326	11.8224	13.9013	13.6175	12.3997	9.99875	12.5074	12.6487	10.977	10.544	11.1904	9.42436	13.6853	12.6989
QDCS-025	Male	65	Colorectal Cancer	16.0273	13.1103	11.0082	12.503	14.0201	15.478	12.5378	11.6003	14.6863	12.238	12.7242	13.6137	15.4907	14.1065	12.5835	14.5014	8.99207	11.8008	12.5049	12.2961	10.1936	14.5386	16.8835	13.2023	13.8487	14.4976	11.6331	12.559	11.5911	10.2904	13.8211	11.3228	13.6495	10.7419	13.4823	13.0936	13.2334	10.4591	11.2527	12.7889	10.8833	10.3062	10.8947	9.32656	13.4504	13.2705
QDCS-026	Male	62	Colorectal Cancer	14.2958	13.3019	11.5761	13.0889	13.804	15.4646	12.5694	11.4729	15.1681	12.4249	12.1125	13.8608	15.3335	14.0596	12.0779	14.7093	9.42622	11.3601	12.643	12.3465	9.95099	14.2907	16.3133	13.6912	13.6111	14.4776	12.9533	12.3679	11.6428	9.69068	14.8399	12.6031	13.5792	11.7416	13.8822	13.6023	12.4698	10.1112	12.7711	12.9658	11.1862	10.531	11.1248	9.87196	14.0712	12.7209
QDCS-027	Female	28	Colorectal Cancer	14.8413	13.1876	10.6087	12.3194	14.1869	15.1753	11.5193	11.2516	14.6666	12.2263	12.3599	13.917	15.5777	13.9132	12.1279	14.1203	8.88343	11.8565	12.2172	12.2321	10.2697	14.2253	17.3689	12.8764	13.2942	14.1264	11.5394	12.6678	11.3337	9.24383	14.0902	11.3783	13.5072	11.2215	13.6158	13.8213	12.6912	9.92444	11.8255	12.6254	10.4763	10.4747	10.5894	8.74618	13.3382	13.2224
QDCS-028	Male	52	Colorectal Cancer	14.7748	13.8101	12.2913	13.6579	15.2403	14.9172	12.2785	12.0819	15.0485	12.5807	12.6119	13.0579	15.5575	13.8941	11.8541	14.344	10.1232	11.5061	12.3569	12.5666	10.5592	14.1259	17.3264	14.1923	13.68	14.3286	13.1202	13.2385	11.3342	9.608	12.4604	11.4298	13.2	12.5027	14.5064	14.0745	12.3629	9.28722	11.7054	12.8674	10.958	10.0786	11.8637	10.6896	13.391	13.0376
QDCS-029	Male	48	Colorectal Cancer	14.7108	13.0711	11.3812	12.8296	13.6628	15.7591	12.1691	11.0526	15.4061	12.0736	12.3028	14.1685	15.4875	13.9565	11.7605	15.0164	9.8203	11.8386	13.2281	12.3403	10.0677	14.5014	17.1993	13.4692	13.3244	14.2827	12.5562	11.5045	11.7417	9.22283	14.2786	12.8155	13.9974	11.985	14.136	13.722	12.0879	10.4547	13.005	12.7939	10.7464	10.3914	10.581	9.05271	13.9174	12.8363
QDCS-030	Male	89	Colorectal Cancer	14.8165	13.6381	11.848	13.4495	14.1027	14.923	12.1754	11.667	15.1237	12.7929	12.6904	13.3494	15.4379	13.7224	11.8667	14.5344	10.3389	11.3372	12.6971	12.5927	10.6129	14.181	17.4926	14.0275	13.5156	14.3866	13.2615	12.9053	11.3283	9.94751	13.2818	11.5387	13.5269	12.4062	14.603	14.1339	12.5096	9.80884	12.0807	12.8046	10.7211	10.228	11.707	10.7756	13.2029	13.1441
QDCS-031	Male	65	Colorectal Cancer	14.9012	13.7744	12.0077	13.5401	14.1923	15.0626	11.9969	11.6383	15.0928	12.382	12.5521	13.6133	15.193	13.9268	11.792	14.4703	8.96305	11.2552	12.4634	12.6408	9.95781	14.2853	16.8673	14.1309	13.63	14.3642	13.2151	12.4829	11.4541	9.77956	13.7386	11.5526	13.2406	12.5907	14.5244	14.199	12.4839	9.85705	11.9553	12.4508	11.1532	10.4877	11.562	10.1228	13.4709	12.8425
QDCS-032	Female	64	Colorectal Cancer	15.0233	13.6926	11.9127	13.4259	13.6271	15.3047	12.3419	11.556	15.2448	12.4756	12.3641	13.8289	15.3961	13.8984	11.9197	14.5581	9.63526	11.5142	12.4346	12.7442	10.477	14.4142	16.8578	14.1371	13.64	14.4042	13.3428	12.137	11.3531	9.49681	14.277	12.3561	13.3147	12.4647	14.4616	14.0628	12.6261	9.88662	12.4331	12.6958	11.0826	10.7057	11.4225	10.0965	13.9416	13.003
QDCS-033	Male	76	Colorectal Cancer	14.503	13.886	11.9732	13.6629	14.6253	15.358	12.0664	11.5382	15.0119	12.2305	12.7695	13.2423	15.4588	13.5677	11.8253	14.4106	9.83654	11.3498	12.6458	12.9139	10.5097	14.0708	17.067	13.912	13.2145	13.9505	12.8717	12.5172	10.8036	9.16713	12.6387	11.7926	13.2492	12.89	14.7751	14.2514	12.4771	8.67919	11.7682	12.3578	10.1078	9.99889	11.5969	9.47896	13.3614	13.082
QDCS-034	Male	57	Colorectal Cancer	14.6914	13.9458	11.7573	13.4545	13.8577	15.2921	12.0275	11.2373	15.0218	12.4751	12.6131	13.3323	14.84	13.5909	11.9547	14.5947	10.2037	11.4067	12.3513	12.9512	9.8748	14.3903	16.2818	13.9931	13.5568	13.9653	13.097	12.2063	11.5734	9.56016	14.2724	12.0909	13.2397	12.6191	14.1699	13.7724	13.0442	9.31966	12.2992	12.5438	10.6837	9.99696	11.8545	10.3315	13.3219	12.6466
QDCS-035	Male	40	Colorectal Cancer	14.9507	13.5434	11.2471	12.9753	14.1928	15.4076	11.8783	11.2228	14.8613	12.6179	12.1968	13.7698	15.2127	13.6682	11.9973	14.6457	9.71762	11.7115	13.0049	12.6729	10.7951	14.2515	16.6992	13.4774	13.2052	13.928	12.4034	12.4015	11.4801	9.11689	13.8781	12.2253	13.2657	12.5912	14.4258	13.9558	12.8551	9.79689	12.0107	12.325	10.5364	9.98262	11.385	9.70178	13.266	13.0273
QDCS-036	Male	68	Colorectal Cancer	15.0616	13.5371	11.3948	12.865	14.1899	15.382	12.1826	11.0375	14.9961	12.7153	12.2349	13.1329	15.2896	13.0551	12.0735	14.493	10.1899	11.3537	12.4456	12.346	10.5309	14.4321	16.4025	13.8324	13.2521	14.1444	13.1056	12.1956	11.273	9.16452	14.4731	12.5639	13.3506	12.1766	14.0906	13.6727	13.2038	9.93231	12.0816	12.3514	11.2308	10.7108	11.5546	10.2152	13.2911	12.9003
QDCS-037	Female	59	Colorectal Cancer	14.8483	14.0323	11.4395	13.3579	15.2455	14.8272	12.3758	11.9654	14.6714	12.13	13.0418	13.4548	14.944	13.8935	12.4718	14.1154	9.47352	11.3044	12.1292	12.8899	9.96816	14.1531	16.0009	13.6335	14.0308	14.1677	12.165	12.9699	11.5132	9.99066	14.6163	11.9786	13.3194	12.543	13.9721	13.6583	12.6505	9.27342	12.0755	12.238	10.5065	9.94348	11.4258	9.95528	13.2527	13.5841
QDCS-038	Male	49	Colorectal Cancer	14.3409	14.1106	11.8655	13.8413	14.6318	15.3249	11.9018	11.3481	14.9736	12.4702	12.2637	13.4825	15.4241	13.4397	12.2095	14.2331	10.1149	11.7721	12.5206	13.0553	11.1208	14.5307	16.5139	13.6144	13.7283	14.1375	12.1827	12.7212	11.3791	9.62882	13.5448	11.917	12.9224	12.9953	14.7113	14.0062	12.3365	9.36197	12.4364	11.9357	10.7178	9.98422	11.71	10.3853	13.6129	13.3322
HSBJ-045	Male	50	Control	14.6895	14.1379	11.6725	13.2463	13.1495	15.0182	11.852	11.1183	14.9261	12.5265	12.4968	13.4536	14.7657	13.0621	12.0839	14.5145	9.49015	9.99197	12.6648	12.9798	9.77958	14.4093	15.9862	13.8816	13.4932	14.0826	12.9691	11.8587	11.4186	9.04896	13.9982	11.9047	13.0729	12.7622	14.2687	13.734	12.8199	9.11908	12.386	11.8232	11.0836	10.2372	11.8242	10.427	12.981	12.2335
HSBJ-048	Male	51	Control	14.5007	14.016	11.6886	13.3739	14.7743	15.5074	11.8601	11.3508	15.1759	12.2773	12.435	13.7746	14.9707	13.8858	12.0287	14.4823	9.87706	10.4389	13.3552	12.7918	10.3691	14.5834	16.6062	14.0753	13.5335	14.1014	13.0491	12.2447	11.3604	9.6278	13.7184	12.4928	13.3644	12.9772	14.6724	14.2657	12.444	10.1256	12.4765	12.1401	11.1556	10.1854	11.1856	10.043	13.3881	12.964
QDCS-039	Male	62	Colorectal Cancer	13.0719	14.0615	11.5362	13.2965	12.4659	15.662	11.5851	10.4495	15.4036	12.0039	12.1088	14.2141	14.3176	14.0755	11.3118	14.8618	9.8546	10.9637	13.0465	13.3198	10.2857	15.1256	16.0349	14.0317	13.867	14.1131	13.1999	11.1051	11.7275	9.16452	15.8282	12.845	14.1182	12.6938	14.5884	14.1691	11.6242	10.1192	13.4746	12.162	11.5185	10.8788	10.4825	9.0311	13.437	12.8123
QDCS-040	Male	62	Colorectal Cancer	14.5277	13.7379	11.7966	13.2812	14.0636	15.5648	12.2883	10.874	15.1304	12.7063	12.2446	14.2128	15.0422	13.5302	12.3138	14.6898	9.48838	10.9867	13.0155	12.8188	9.85568	14.6029	15.736	13.7963	13.4551	13.7661	12.9435	12.0313	11.6165	9.61907	15.3279	12.6155	13.342	12.4464	14.1059	13.5643	12.9958	10.1931	13.1217	12.1344	11.409	10.8721	11.4581	10.2289	13.5044	12.3532
QDCS-041	Male	49	Colorectal Cancer	15.0476	13.3733	11.259	12.8937	13.8976	15.9866	12.2049	11.2094	15.1551	12.5935	12.3336	13.2492	15.559	13.1277	12.1348	14.6905	10.1986	11.5907	13.0524	12.5517	10.8219	14.2926	17.3027	13.556	13.2187	13.9586	12.5706	12.0157	11.2692	9.01253	13.6133	12.3119	14.0083	12.3589	14.3666	13.8559	12.797	9.46675	12.8055	12.589	10.2371	9.97534	11.2804	9.73332	13.3617	12.9043
QDCS-042	Male	65	Colorectal Cancer	15.4607	12.6475	10.2711	11.6156	13.933	16.2759	11.8509	9.78089	14.7352	11.4776	11.86	14.1257	15.6685	14.1446	11.5879	14.4257	9.78951	12.4548	13.4007	12.2995	11.2629	14.8412	18.0117	12.2238	13.5239	14.229	11.1778	11.8204	11.3506	8.33142	15.5295	12.7667	14.1595	10.431	14.0151	14.0082	11.8094	9.66063	12.4434	12.2338	10.5283	10.5374	9.73225	8.41972	13.3618	13.5422
QDCS-043	Female	62	Colorectal Cancer	14.8877	13.8979	11.5896	13.156	13.3033	15.9508	11.7345	10.6388	15.3111	12.5924	12.3395	13.541	15.4522	12.8601	11.8181	14.9132	9.55066	11.6194	13.0468	12.863	10.7405	14.4501	17.1475	13.7347	13.2457	14.0498	12.8052	11.5893	11.411	9.17669	14.1098	12.3322	13.1322	12.3461	14.2709	13.7857	13.245	9.35882	12.5707	12.398	10.7597	10.261	11.3901	9.82701	12.8585	12.1028
QDCS-044	Female	56	Colorectal Cancer	14.7308	13.2781	10.9515	12.4495	12.2737	16.1441	11.8978	10.7128	15.1275	11.8153	11.9106	13.5137	15.2866	12.9506	11.8123	14.8764	9.33153	12.0545	13.4195	12.7017	11.3887	14.3719	17.8907	13.4622	12.9159	14.0489	12.3363	11.4039	11.0794	8.95251	14.1321	12.4837	13.9085	12.2449	14.9819	14.4311	12.2772	9.87696	12.6756	12.339	10.0035	9.97448	10.8143	8.5986	13.3124	12.8593
QDCS-045	Female	50	Colorectal Cancer	15.2006	13.8502	11.7474	13.4763	14.0479	15.7403	12.5313	11.2724	15.0747	12.26	12.2973	13.9581	15.1256	14.0917	11.9769	14.1214	9.27866	11.3503	12.9444	12.6648	10.6576	14.4535	16.9041	13.8216	13.4577	14.0551	12.6336	13.0525	11.1457	9.94981	14.4162	12.5907	13.655	13.0524	14.873	14.2663	12.6563	9.50809	12.2341	12.4928	11.046	10.1616	11.4432	9.91648	14.1755	13.9614
QDCS-046	Female	71	Colorectal Cancer	14.2324	13.9169	11.6181	13.4525	14.3487	15.3424	11.8242	10.9775	14.9385	11.8661	12.2224	13.9348	14.8529	14.0958	11.7861	14.2017	9.46414	11.1891	12.9645	12.7227	10.3571	14.6282	16.5435	13.8268	13.6344	14.1131	12.6293	12.3965	11.0654	9.26502	15.1924	11.9819	13.5558	12.8654	14.396	13.9404	12.2558	9.82961	12.388	11.9794	10.9326	9.98958	11.0153	9.44027	13.3299	12.8432
QDCS-047	Male	71	Colorectal Cancer	15.4231	13.6849	11.2982	13.0486	13.5285	15.8458	12.3536	11.1212	15.0914	12.5182	12.5777	13.4885	15.2536	13.5531	12.2858	14.9306	9.6566	11.6727	13.3044	12.8193	10.5314	14.3695	16.6363	13.709	13.5943	14.3536	12.5598	12.0587	11.7893	9.64362	14.3892	12.0612	13.426	12.0895	14.0643	13.58	13.3156	9.79099	12.4805	12.5214	10.9432	10.4554	11.4579	10.0969	13.2189	12.6192
QDCS-048	Male	39	Colorectal Cancer	15.114	13.9858	11.7205	13.2756	15.051	15.6255	12.3047	11.4713	15.0063	12.4339	12.6727	13.3174	15.374	13.628	12.1126	14.3419	9.45371	11.0412	12.3581	12.6657	9.94237	14.3461	16.8372	13.8085	13.4195	14.2492	12.6091	12.5899	11.2238	9.33679	13.3986	11.3715	13.4004	12.8567	14.5574	13.9886	12.6809	10.0063	12.0593	12.7109	10.8649	10.079	11.715	10.0153	13.3179	13.2018
QDCS-050	Female	70	Colorectal Cancer	14.5853	13.9534	11.3422	13.1856	13.4246	15.1027	11.8095	10.7457	14.8924	12.0476	11.8227	14.1409	14.0171	14.3706	11.3725	14.0335	8.59104	11.0639	12.4214	12.2368	10.848	14.4799	16.5331	13.7977	13.8692	14.3452	12.3884	12.6639	10.7174	9.2987	15.0964	12.2812	13.7615	13.0481	14.8333	14.3161	12.2464	10.208	12.737	11.9381	11.2202	10.296	10.4879	9.15713	14.0995	13.9625
QDCS-052	Male	55	Colorectal Cancer	12.8132	14.1828	11.5003	13.3982	12.8221	15.3932	11.5389	10.4916	15.4291	11.4732	12.0924	14.3797	14.1003	14.2303	11.4572	14.7362	9.67635	10.5537	12.3872	13.2078	10.2502	14.8797	16.1081	14.2051	14.0387	14.3704	13.144	11.3299	11.4105	8.90265	15.6224	11.7918	13.7088	13.1874	14.6783	14.3994	11.3682	9.02304	12.4748	12.2622	10.7162	9.68769	10.5927	8.85553	13.3298	12.4205
QDCS-053	Male	53	Colorectal Cancer	14.759	13.7642	11.0317	12.9433	13.9659	15.8337	12.1992	11.2546	15.1752	12.7626	12.5037	13.6617	15.5775	13.5411	12.1046	14.7883	10.3931	11.4756	12.4652	12.5764	10.4488	14.4122	16.6879	13.3986	13.3974	14.1383	12.1394	12.084	11.4471	9.36295	14.1921	12.3881	13.5204	11.8418	13.9328	13.7339	12.4942	10.0652	12.5231	12.433	10.7309	10.1155	11.318	9.25779	13.655	13.1151
QDCS-054	Male	82	Colorectal Cancer	14.9698	14.1342	12.009	13.8411	15.2719	15.4544	12.2836	11.6038	14.8071	12.851	12.6081	13.1672	15.4285	13.3909	12.3671	14.271	9.82277	11.5426	12.1197	12.9204	10.0005	14.1938	16.0655	13.684	13.4607	13.7971	12.5419	12.8288	11.7761	10.2395	13.5008	11.6086	12.8516	12.679	13.9471	13.4917	13.5005	9.79468	12.0362	12.4337	11.1461	10.2326	11.553	10.0696	13.535	13.0299
QDCS-055	Male	71	Colorectal Cancer	14.6979	13.8419	11.5404	13.3675	14.253	15.4798	12.0807	11.2385	15.2646	12.3897	12.2976	13.7106	15.0428	13.712	11.8222	14.8497	9.96937	11.1283	12.2825	13.1351	10.0512	14.6718	16.4204	13.771	13.5906	14.2949	12.5679	12.0148	11.5013	9.03371	14.8217	11.845	13.3228	12.8608	14.2766	13.9582	12.5658	9.88731	12.418	12.3312	11.0414	10.2662	11.2245	10.2945	13.3371	12.5794
QDCS-056	Male	64	Colorectal Cancer	14.8865	13.8102	11.2328	13.2297	13.6266	15.4168	11.9032	10.8686	14.8707	12.6725	12.0479	13.2852	15.0988	12.7643	12.2191	14.6197	9.77158	11.131	11.7735	12.7068	9.78717	14.2231	15.8712	13.5215	13.458	13.8723	12.3875	11.566	11.2141	9.20894	14.5782	11.778	13.0198	12.4219	13.8145	13.8085	13.2908	8.9877	12.3289	12.2359	10.6783	10.0384	11.3965	10.1121	13.2096	12.4699
QDCS-057	Female	77	Colorectal Cancer	14.556	14.1244	11.5875	13.3107	12.5903	15.6397	11.8404	10.6063	15.4131	12.048	12.4638	13.4894	14.9929	13.4619	11.4902	14.8066	10.9624	11.4374	12.7342	13.2473	11.1768	14.6204	16.7873	13.9076	13.5491	13.9288	12.9017	11.5838	11.2486	8.71167	14.7203	12.7438	13.6712	13.0394	14.8714	14.3309	12.3588	9.00078	12.5878	12.3894	10.4104	9.8465	11.2475	9.78099	13.4195	12.9803
QDCS-058	Male	64	Colorectal Cancer	15.3337	13.5895	10.9856	12.8922	14.0578	15.5872	12.2791	11.102	15.0755	12.9803	12.172	13.0892	15.4086	13.0756	12.4107	15.0643	9.90995	11.3628	12.0408	12.4949	10.2381	14.3258	16.3413	13.3514	13.42	14.0316	12.2225	12.0852	11.7684	9.38239	14.6614	12.0826	13.3413	11.8013	13.8083	13.2317	13.0155	10.0637	12.7766	12.4191	11.1435	10.5727	11.3307	10.0423	13.2783	12.8843
QDCS-059	Female	65	Colorectal Cancer	15.4457	13.0636	10.512	12.3833	14.6339	16.057	12.4223	10.8829	14.9059	12.5893	12.3287	13.7336	15.8332	13.7542	12.3145	14.6988	8.50379	11.3656	12.5246	12.3442	10.1698	14.2946	17.1759	12.4561	13.3157	14.2381	11.3208	12.3465	11.5124	9.53547	14.7734	12.0447	13.5595	11.327	13.6841	13.2096	12.9458	10.4513	12.6185	12.375	11.1084	10.5566	10.684	9.23283	13.6117	13.1317
QDCS-060	Female	50	Colorectal Cancer	15.4995	13.0684	10.4932	12.6151	15.1317	15.501	11.869	11.358	14.6782	12.2827	12.4653	13.5159	15.5485	13.7774	12.4854	14.3888	9.44508	11.6963	12.6046	12.4702	10.4132	14.0763	16.7281	12.5047	13.5316	14.0338	11.332	12.619	11.4856	9.93087	13.8486	11.6747	13.6642	11.4452	13.8215	13.5489	13.1332	10.1833	12.1583	12.5529	10.8704	10.0904	10.9547	9.46109	13.4628	13.4777
QDCS-061	Female	73	Colorectal Cancer	15.3171	12.8281	10.2816	12.0564	14.9955	16.098	12.373	11.038	14.9816	12.716	11.4265	13.5947	15.6382	13.4797	12.1306	14.7471	9.98575	11.8076	12.6821	11.999	10.5139	14.2573	17.2689	12.7357	13.1998	13.8756	11.5032	12.6125	11.2301	9.46392	14.3309	12.1738	13.5865	11.2311	13.8052	13.6426	13.0772	10.8174	12.5807	12.3214	10.7827	10.4637	10.9965	9.43794	13.6351	13.1555
QDCS-062	Female	66	Colorectal Cancer	15.4163	13.5062	11.1652	12.7897	14.2448	15.661	12.6627	11.4027	15.2181	12.4433	12.1859	13.7	15.3613	13.7206	12.1841	14.733	10.2097	10.8527	12.5605	12.6686	10.2219	14.5538	16.77	13.662	13.5067	14.0796	12.4408	12.4143	11.3592	9.31917	14.1728	12.406	13.6041	12.1725	14.1233	13.7753	13.0773	10.2807	12.3775	12.6494	11.062	10.458	11.3795	10.0684	13.5963	13.1534
QDCS-051	Male	73	Colorectal Cancer	14.1927	13.8242	10.9663	12.9329	13.0356	16.1013	11.587	10.1778	15.3923	11.5131	12.1642	14.2052	14.7344	14.1536	11.3927	14.8838	9.84389	11.2683	12.3162	12.9223	10.4028	15.0443	16.6839	13.5321	13.9325	14.2293	12.3479	11.271	11.2192	8.33371	16.1185	12.2735	14.2654	11.9357	14.1543	13.5477	11.4786	9.64975	13.1183	12.5846	10.783	10.225	9.86867	7.90213	13.381	12.8474
HSBJ-050	Male	56	Control	14.4773	14.0148	11.6838	13.1612	13.5354	14.9368	12.0057	11.1806	15.0565	12.5052	12.3683	13.5698	14.6329	13.3334	12.1976	14.6353	9.61936	9.75105	12.8774	12.8126	10.3613	14.2164	15.8518	13.7142	13.8473	14.1373	12.4801	11.8805	11.6271	9.47584	14.6195	12.155	13.1129	12.5695	14.1781	14.1732	12.706	9.50902	12.4485	12.1208	10.8244	9.87393	11.6517	10.6671	13.1312	12.7938
HSBJ-051	Male	55	Control	15.3203	13.7416	11.3204	12.9446	13.1643	15.7853	12.4325	11.4609	15.1343	12.8199	12.708	13.3382	15.2664	13.2585	12.322	14.9314	9.71299	10.2096	12.5587	12.7572	10.3073	14.1426	16.7889	13.6033	13.5003	14.1668	12.443	11.9546	11.7773	9.27503	13.7547	12.5918	13.5685	12.1514	14.1145	13.5071	13.4364	10.3295	12.7473	12.5914	11.2641	10.0771	11.7396	10.0583	13.5885	13.0582
[truncated: 1,091 more columns]
